# Supplementary material for: The Association between Tear Film Thickness as Measured with OCT and Symptoms and Signs of Dry Eye Disease: A Pooled Analysis of 6 Clinical Trials
Source: MDPI journal article supplement (doi:10.3390/jcm9113791), 2020-11-23
Supplement: s1 [file s1]

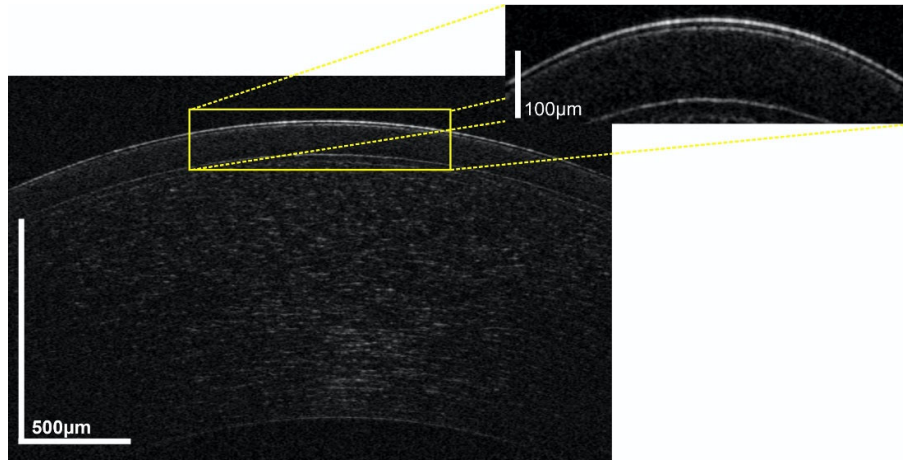

**Supplement figure 1:** Typical example of an ultrahigh-resolution optical coherence tomography image showing a cross section through the cornea. The yellow box depicts a magnified image of the corneal epithelial tissue and the precorneal tear film.
